# Supplementary material
Source: PubMed Central journal article supplement (PMC6443091)
Supplement: NIHMS1007765-supplement-Supplemental.pdf [file NIHMS1007765-supplement-Supplemental.pdf]

Supplementary Table 1. Weekly CBT Session Topics

| Week | Session Topic                        | CBT Skills Education                                                                                                                                                                 | Homework                                                           |
|------|--------------------------------------|--------------------------------------------------------------------------------------------------------------------------------------------------------------------------------------|--------------------------------------------------------------------|
| 1    | Introducing CBT                      | a. Agenda Setting, Bridging<br>b. CBT Model<br>c. Identifying and rating moods with Subjective Units of Distress (SUDS)                                                              | Rating Moods Sheet                                                 |
| 2    | Situations and Emotions              | a. ABC Model; Identifying situations, behaviors, emotions                                                                                                                            | ABC Sheet                                                          |
| 3    | Cognitions I                         | a. Identifying cognitions<br>b. Automatic Thought Record (ATR) – 1st 3 Columns                                                                                                       | ART Sheet (3 Columns)                                              |
| 4    | Cognitions II: Cognitive Distortions | a. Identifying cognitive distortions<br>b. Automatic Thought Record (ATR) – 5 Columns                                                                                                | ATR Sheet (5 Columns)                                              |
| 5    | Behaviors I                          | a. Behavioral Activation; behaviors / activities and mood<br>b. Activities checklist<br>c. Activity and mood monitoring                                                              | Mood Monitoring & Activity Chart Sheet                             |
| 6    | Behaviors II: Problem Solving        | a. Pros and cons of behaviors<br>b. Consequences of behaviors<br>c. “SOLVED” approach to problem solving                                                                             | “SOLVED” Problem Solving Exercise Sheet                            |
| 7    | Relaxation Techniques                | a. Diaphragmatic breathing<br>b. Progressive muscle relaxation (PMR)<br>c. Guided imagery                                                                                            | Practice diaphragmatic breathing, PMR or guided imagery once daily |
| 8    | Wrap-Up                              | a. Maintaining gains<br>b. Self-management<br>c. Wrap-up<br>i. Likes / dislikes from CBT process<br>ii. Most useful skills<br>iii. Therapy termination, planning for self-management | N/A                                                                |

Supplementary Table 2. Assay details

| Assay                               | Laboratory <sup>a</sup> | Platform            | Vendor                      | Kit Range            |
|-------------------------------------|-------------------------|---------------------|-----------------------------|----------------------|
| <b>Androgens</b>                    |                         |                     |                             |                      |
| Total testosterone                  | DRC                     | Double antibody RIA | MP Biomedicals              | Not reported         |
| Free testosterone                   | DRC                     | Coated tube RIA     | Beckman Coulter Diagnostics | 0.18 - 100.0 pg/mL   |
| Sex hormone binding globulin        | CHOP                    | ELISA               | ALPCO Diagnostics           | 33.00 - 2,950 nmol/L |
| <b>Metabolic Labs</b>               |                         |                     |                             |                      |
| Cholesterol                         | CHOP                    | MicroSlide assay    | Orthoclinical Diagnostics   | 50 – 325 mg/dL       |
| HDL                                 | CHOP                    | MicroSlide assay    | Orthoclinical Diagnostics   | 5.0 – 110.0 mg/dL    |
| Triglycerides                       | CHOP                    | MicroSlide assay    | Orthoclinical Diagnostics   | 10.0 – 525.0 mg/dL   |
| Glucose                             | CHOP                    | MicroSlide assay    | Orthoclinical Diagnostics   | 20.0 – 625.0 mg/dL   |
| Insulin                             | DRC                     | Double antibody RIA | EMD Millipore               | 2 – 200 µU/mL        |
| <b>Inflammatory Markers</b>         |                         |                     |                             |                      |
| Apolipoprotein A1                   | CHOP                    | ELISA               | R&D Systems                 | 0.125 - 4.000 g/L    |
| Apolipoprotein B                    | CHOP                    | ELISA               | R&D Systems                 | 39.1 - 2,500 µg/mL   |
| Interleukin-6                       | CHOP                    | ECL                 | Mesoscale Discovery         | 0.183 - 749 pg/mL    |
| High sensitivity C-reactive protein | CHOP                    | Immulinite 1000     | Siemens                     | 0.30 - 100 mg/L      |
| <b>Salivary cortisol</b>            | CHOP                    | ELISA               | Salimetrics                 | 0.00 – 3.00 µg/dL    |

<sup>a</sup>Labs were run by either the Translational Core Laboratory at the Children’s Hospital of Philadelphia (CHOP) or the University of Pennsylvania Diabetes Research Center (DRC)
